# Supplementary material
Source: MDPI journal article supplement (https://www.mdpi.com/1999-4907/13/2/326)
Supplement: s1 [file s1]

Table S1 Sampling points information

| Populations                         | Latitude | Longitude | Altitude | Annual mean temperature | Annual mean precipitation | Sample size/tree |
|-------------------------------------|----------|-----------|----------|-------------------------|---------------------------|------------------|
| Jiufeng, Beijing, China (JF)        | 40°03'N  | 116°05'E  | 400m     | 12.5°C                  | 628.9mm                   | 10               |
| Maiji Mountain, Gansu, China (MJS)  | 34°21'N  | 106°01'E  | 1400m    | 9.0°C                   | 689.2mm                   | 10               |
| Lantian, Shaanxi, China (LT)        | 34°04'N  | 109°22'E  | 760m     | 13.1°C                  | 720.4mm                   | 12               |
| Wuzi Mountain, Shaanxi, China (WZS) | 32°57'N  | 107°51'E  | 700m     | 12.9°C                  | 912.4mm                   | 10               |
| Baiwa Mountain, Shanxi, China (BWS) | 37°20'N  | 111°15'E  | 1250m    | 8.0°C                   | 518.6mm                   | 10               |
